# Supplementary material for: Hydrophilicity and surface charge modulation of Ti 3 C 2 T x MXene based membranes for water desalination
Source: Royal Society of Chemistry journal article supplement (doi:10.1039/d4ra02678k), 2024-01-01
Supplement: d4ra02678k1.pdf [file d4ra02678k1.pdf]

# Hydrophilicity and Surface Charge Modulation of $\text{Ti}_3\text{C}_2\text{T}_x$ MXene Based Membranes for Water Desalination

*Laxmi Pandey,<sup>a</sup> Wentao Liang<sup>a</sup> Armin VahidMohammadi<sup>d</sup>, Teng Zhang<sup>d</sup>, Yury Gogotsi<sup>d</sup> and  
Meni Wanunu<sup>\* a,b,c</sup>*

<sup>a</sup> Department of Physics, Northeastern University, Boston, MA 02115, USA

<sup>b</sup> Department of Bioengineering, Northeastern University, Boston, MA 02115, USA

<sup>c</sup> Department of Chemistry and Chemical Biology, Northeastern University, Boston, MA 02115,  
USA

<sup>d</sup> A.J. Drexel Nanomaterials Institute and Department of Materials Science and Engineering,  
Drexel University, Philadelphia, PA 19104, USA

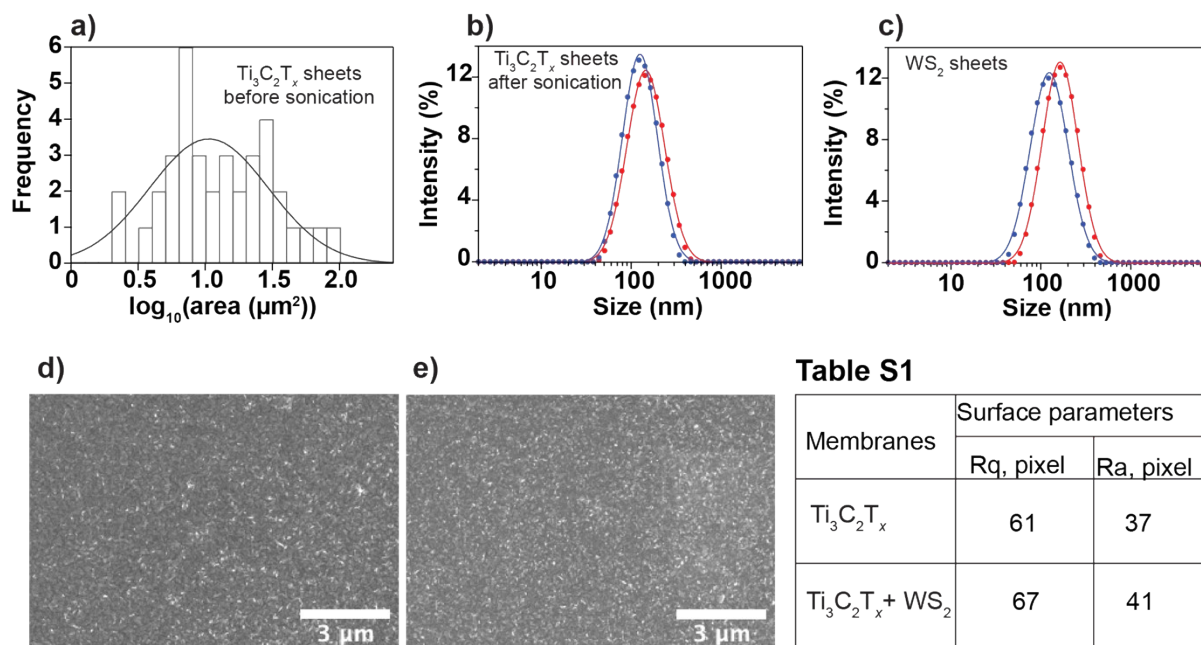

**Figure S1:** Nanosheets and membrane surfaces characterization: a) area of Ti<sub>3</sub>C<sub>2</sub>T<sub>x</sub> (before sonication) measured with ImageJ from three different AFM images; b) and c) size of Ti<sub>3</sub>C<sub>2</sub>T<sub>x</sub> nanosheets (after 1.5 hours of ultrasonic probe sonication with Hielscher UP100H at 60% power) measured with Zetasizer Nano ZS and WS<sub>2</sub> measured with Zetasizer Nano ZS respectively, two curves are shown here to compare the batch-to-batch nanosheet size differences. d) and e) SEM surface images of Ti<sub>3</sub>C<sub>2</sub>T<sub>x</sub> and Ti<sub>3</sub>C<sub>2</sub>T<sub>x</sub> + WS<sub>2</sub> membranes, respectively. Table S1 reports the surface parameters of membranes obtained by analyzing SEM images (d and e) using ImageJ software.

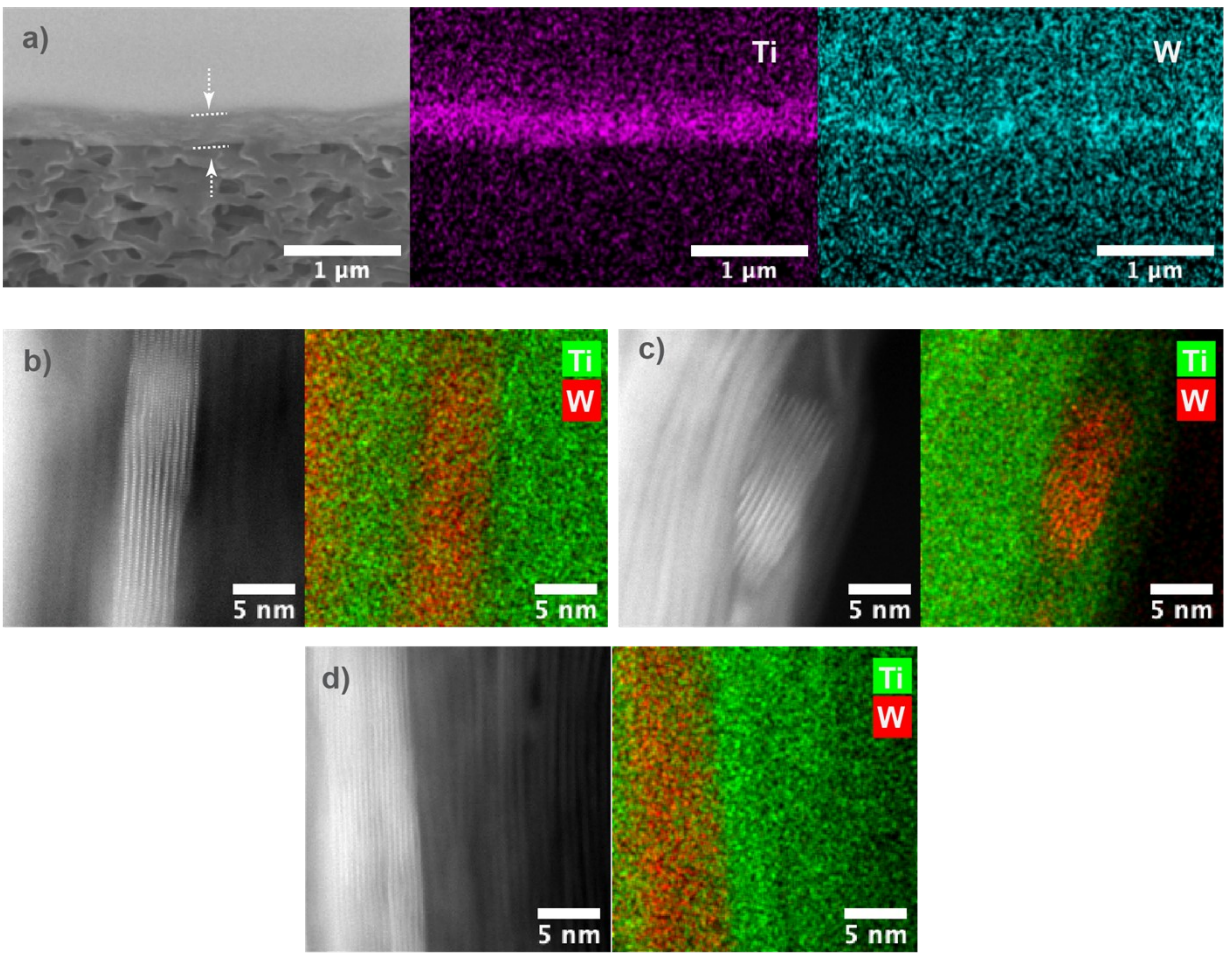

**Figure S2:** Cross-section characterization of a  $\text{Ti}_3\text{C}_2\text{T}_x + \text{WS}_2$  composite membrane: a) SEM image and false-color EDX elemental maps for Ti (purple) and W (light blue). b-d) HAADF-STEM image along with false-color EDX elemental maps for Ti (green) and W (red) of different parts of the membrane.

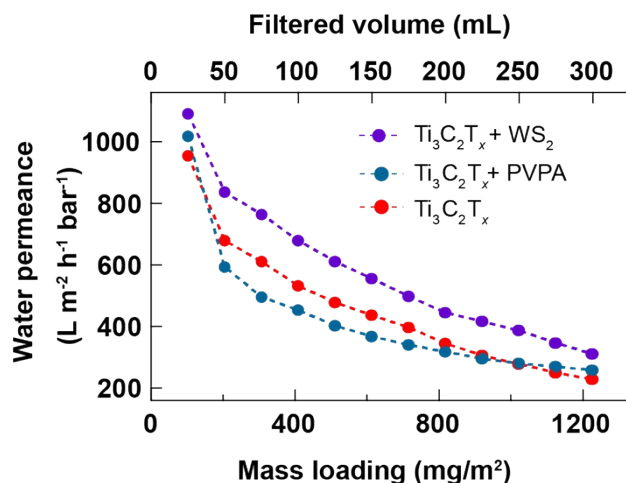

Figure S3: Comparison of water permeance of different membranes based on mass loading. 3 mL of solution containing 0.2 mg/mL of nanosheets was first diluted to 300 mL and vacuum filtered on PES substrate. To prepare MXene + WS<sub>2</sub> suspension, 2 mL of 0.2 mg/mL of MXene was mixed with 1 mL of 0.2 mg/mL of WS<sub>2</sub>.

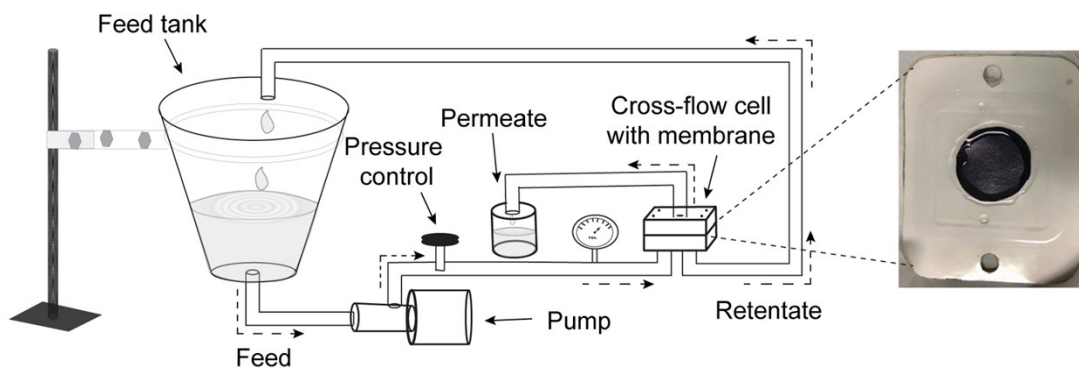

**Figure S4:** Schematic illustration of the cross-flow system. The membrane to be tested is fitted in the cross-flow cell, and the feed tank is filled with a salt solution pressurized by the pump. Dashed arrows show the direction of feed and permeate flow.

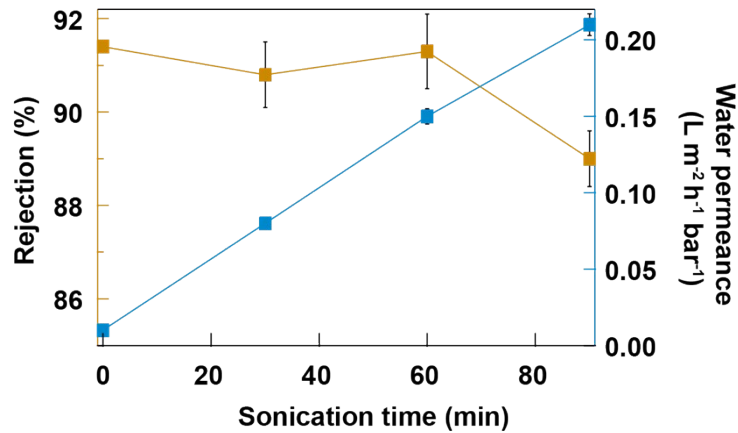

**Figure S5:** Performance of  $\text{Ti}_3\text{C}_2\text{T}_x$  lamellar membrane in the cross-flow system as a function of  $\text{Ti}_3\text{C}_2\text{T}_x$  nanosheet sonication time. Longer sonication times lead to a reduction in the mean nano-capillary length by reducing nanosheet size, which helps to increase water permeance. The feed solution was 0.02 M  $\text{Na}_2\text{SO}_4$  in these experiments.

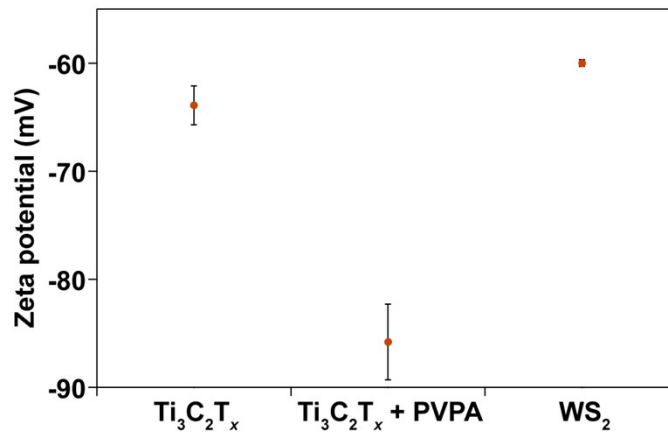

**Figure S6:** Comparison of zeta potential of  $\text{Ti}_3\text{C}_2\text{T}_x$  (90 min sonicated nanosheets),  $\text{WS}_2$ , and  $\text{Ti}_3\text{C}_2\text{T}_x + \text{PVPA}$  dispersion in an aqueous solution. The concentration of nanosheets in each dispersion was 0.1 mg/mL.  $\text{Ti}_3\text{C}_2\text{T}_x + \text{PVPA}$  dispersion was prepared by heating 1% of PVPA with 0.2 mg/mL of  $\text{Ti}_3\text{C}_2\text{T}_x$  at 90°C for about 20 min. For pH adjustment, HCl and NaOH were added to the dispersion dropwise.

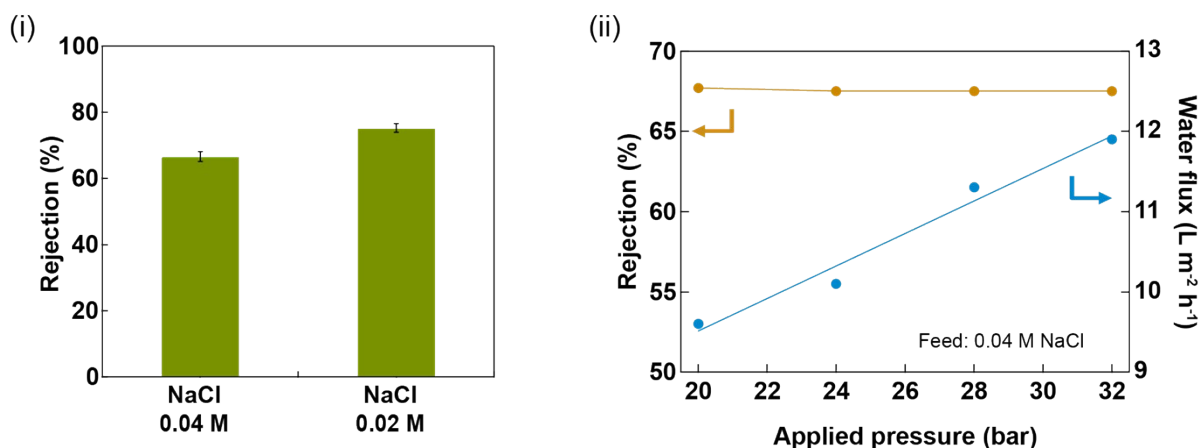

Figure S7: (i) Concentration-dependent , (ii) Pressure-dependent performance of MXene + WS<sub>2</sub> membrane. The mass ratio of MXene and WS<sub>2</sub> was 2:1 in these membranes. For concentration dependent performance, applied pressure was 20 bar.

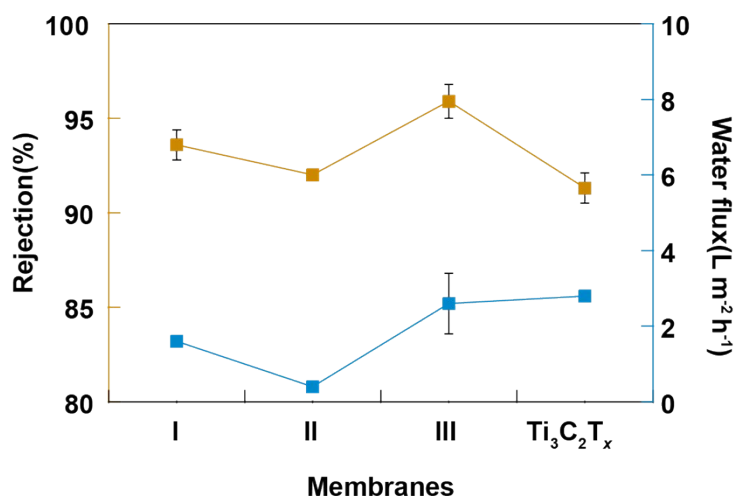

**Figure S8:** Comparison of Ti<sub>3</sub>C<sub>2</sub>T<sub>x</sub> + PVPA prepared under the different conditions with Ti<sub>3</sub>C<sub>2</sub>T<sub>x</sub> - only membrane. For optimization purposes, PVPA was mixed with Ti<sub>3</sub>C<sub>2</sub>T<sub>x</sub> dispersion and prepared the membrane in 3 cases: for type I membrane, the membrane was prepared by mixing 1% PVPA with 0.05mg/mL of Ti<sub>3</sub>C<sub>2</sub>T<sub>x</sub> dispersion, and the membrane was dried at room temperature; for type II membrane, the membrane was prepared by mixing 1% PVPA with 0.05mg/mL of Ti<sub>3</sub>C<sub>2</sub>T<sub>x</sub> dispersion and the membrane was dried at 80°C; for type III membrane, the dispersion (1% PVPA with 0.1mg/mL) was heated at 80°C to 90°C for about 20 min, and the membrane was prepared and dried at room temperature. Feed, 0.02 M Na<sub>2</sub>SO<sub>4</sub>, was pressurized at 20 bar in these experiments.

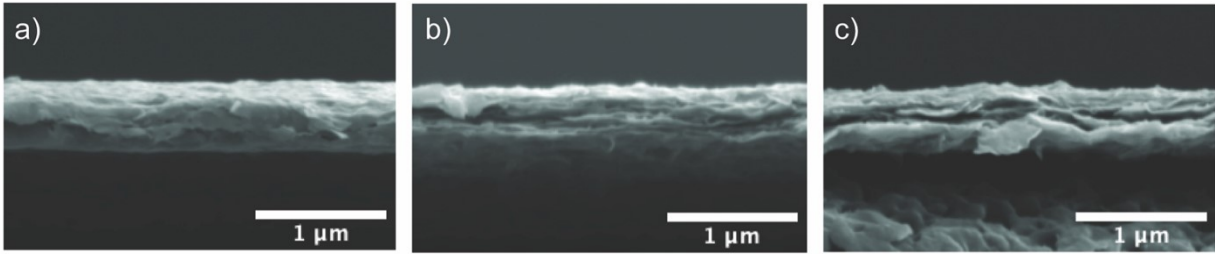

**Figure S9:** Thickness comparison of  $\text{Ti}_3\text{C}_2\text{T}_x$  based membranes; Cross-section SEM image of a)  $\text{Ti}_3\text{C}_2\text{T}_x$  membrane, b)  $\text{Ti}_3\text{C}_2\text{T}_x + \text{WS}_2$  membrane, and c)  $\text{Ti}_3\text{C}_2\text{T}_x + \text{PVPA}$  membrane, respectively. These membranes were  $0.5 \mu\text{m}$  thick.

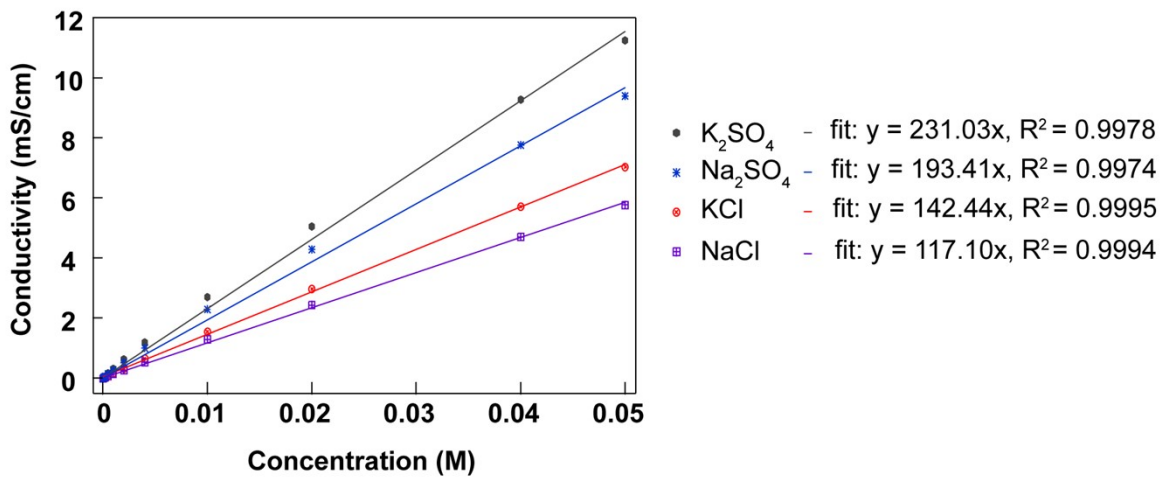

**Figure S10:** Concentration vs. conductivity graph for different salts. The conductivity of DI was minimal ( $\sim 1 \mu\text{S}/\text{cm}$ ), so line fits were forced to pass through the origin.

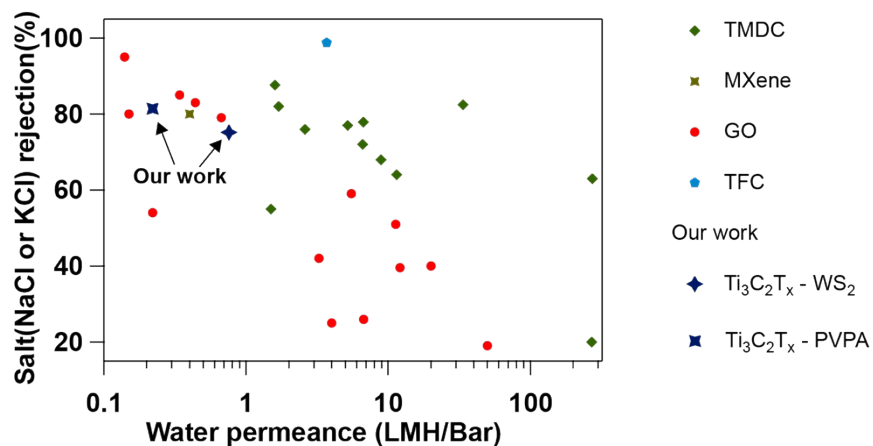

**Figure S11:** Comparison of the performance of  $\text{Ti}_3\text{C}_2\text{T}_x$  - based membranes in this work with other literature reports for GO<sup>1-6</sup>, MXene<sup>7</sup>, TMDC<sup>8-11</sup> and TFC<sup>12</sup> membranes.

**References:**

- 1 Yang, Q. *et al.* Ultrathin graphene-based membrane with precise molecular sieving and ultrafast solvent permeation. *Nature Materials* **16**, 1198-1202 (2017). <https://doi.org:10.1038/nmat5025>
- 2 Guan, K. *et al.* Nanochannel-confined charge repulsion of ions in a reduced graphene oxide membrane. *Journal of Materials Chemistry A* **8**, 25880-25889 (2020). <https://doi.org:10.1039/D0TA08881A>
- 3 Hu, M. & Mi, B. Enabling Graphene Oxide Nanosheets as Water Separation Membranes. *Environmental Science & Technology* **47**, 3715-3723 (2013). <https://doi.org:10.1021/es400571g>
- 4 Han, Y., Xu, Z. & Gao, C. Ultrathin Graphene Nanofiltration Membrane for Water Purification. *Advanced Functional Materials* **23**, 3693-3700 (2013). <https://doi.org:https://doi.org/10.1002/adfm.201202601>
- 5 Han, Y., Jiang, Y. & Gao, C. High-Flux Graphene Oxide Nanofiltration Membrane Intercalated by Carbon Nanotubes. *ACS Applied Materials & Interfaces* **7**, 8147-8155 (2015). <https://doi.org:10.1021/acsami.5b00986>
- 6 Morelos-Gomez, A. *et al.* Effective NaCl and dye rejection of hybrid graphene oxide/graphene layered membranes. *Nature Nanotechnology* **12**, 1083-1088 (2017). <https://doi.org:10.1038/nnano.2017.160>
- 7 Zhu, J. *et al.* Precisely Tunable Ion Sieving with an Al<sub>13</sub>-Ti<sub>3</sub>C<sub>2</sub>T<sub>x</sub> Lamellar Membrane by Controlling Interlayer Spacing. *ACS Nano* **14**, 15306-15316 (2020). <https://doi.org:10.1021/acsnano.0c05649>
- 8 Ries, L. *et al.* Enhanced sieving from exfoliated MoS<sub>2</sub> membranes via covalent functionalization. *Nature Materials* **18**, 1112-1117 (2019). <https://doi.org:10.1038/s41563-019-0464-7>
- 9 Mei, L. *et al.* Simultaneous electrochemical exfoliation and covalent functionalization of MoS<sub>2</sub> membrane for ion sieving. *Advanced Materials* **n/a**, 2201416 (2022). <https://doi.org:https://doi.org/10.1002/adma.202201416>
- 10 Sapkota, B. *et al.* High permeability sub-nanometre sieve composite MoS<sub>2</sub> membranes. *Nature Communications* **11**, 2747 (2020). <https://doi.org:10.1038/s41467-020-16577-y>
- 11 Hoenig, E. *et al.* Controlling the Structure of MoS<sub>2</sub> Membranes via Covalent Functionalization with Molecular Spacers. *Nano Letters* **20**, 7844-7851 (2020). <https://doi.org:10.1021/acs.nanolett.0c02114>
- 12 Kadhom, M. & Deng, B. Synthesis of high-performance thin film composite (TFC) membranes by controlling the preparation conditions: Technical notes. *Journal of Water Process Engineering* **30**, 100542 (2019). <https://doi.org:https://doi.org/10.1016/j.jwpe.2017.12.011>
